# Supplementary material for: Patterns Of Multimorbidity Of Patients In Geriatric Care – A Register-Based Cohort Study In Sweden
Source: Research Square preprint supplement (doi:10.21203/rs.3.rs-1315408/v1), 2022-02-21
Supplement: Supplementary file 1 [file da004413718e14c2868bcdd8.docx]

Supplement C - Multimorbidity patterns by geriatric patients

Comparison between ACG grouping on the basis of ”Main diagnosis” and ”All registered diagnoses” respectively

*Part 1: Expanded Diagnosis Clusters – main diagnosis*

|  | MUS04 | Fractures (excluding digits) | 783 |  |
| --- | --- | --- | --- | --- |
|  | CAR05 | Congestive heart failure | 762 |  |
|  | MUS17 | Musculoskeletal disorders, other | 646 |  |
|  | GUR08 | Urinary tract infections | 610 |  |
|  | MUS10 | Fracture of neck of femur (hip) | 538 |  |
|  | NUR05 | Cerebrovascular disease | 509 |  |
|  | RES14 | Aspiration and bacterial pneumonias | 464 |  |
|  | RES02 | Acute lower respiratory tract infection | 422 |  |

*Part 2: Expanded Diagnosis Clusters – all diagnoses*

|  | ADM05 | Administrative concerns and non-specific laboratory abnormalities | 5627 |  |
| --- | --- | --- | --- | --- |
|  | CAR14 | Hypertension, w/o major complications | 4236 |  |
|  | MUS01 | Musculoskeletal signs and symptoms | 3594 |  |
|  | CAR09 | Cardiac arrhythmia | 3195 |  |
|  | NUR01 | Neurologic signs and symptoms | 2853 |  |
|  | CAR05 | Congestive heart failure | 2429 |  |
|  | GUR08 | Urinary tract infections | 2296 |  |
|  | MUS17 | Musculoskeletal disorders, other | 1903 |  |
|  | ADM06 | Preventive care | 1614 |  |
|  | HEM02 | Deficiency anemias | 1552 |  |
|  | NUR05 | Cerebrovascular disease | 1489 |  |
|  | REN01 | Chronic renal failure | 1466 |  |
